# Supplementary material
Source: Springer Nature journal article supplement (https://www.springermedizin.de/resource/supplementary/13063_2009_373_MOESM3_ESM.pdf/9618092)

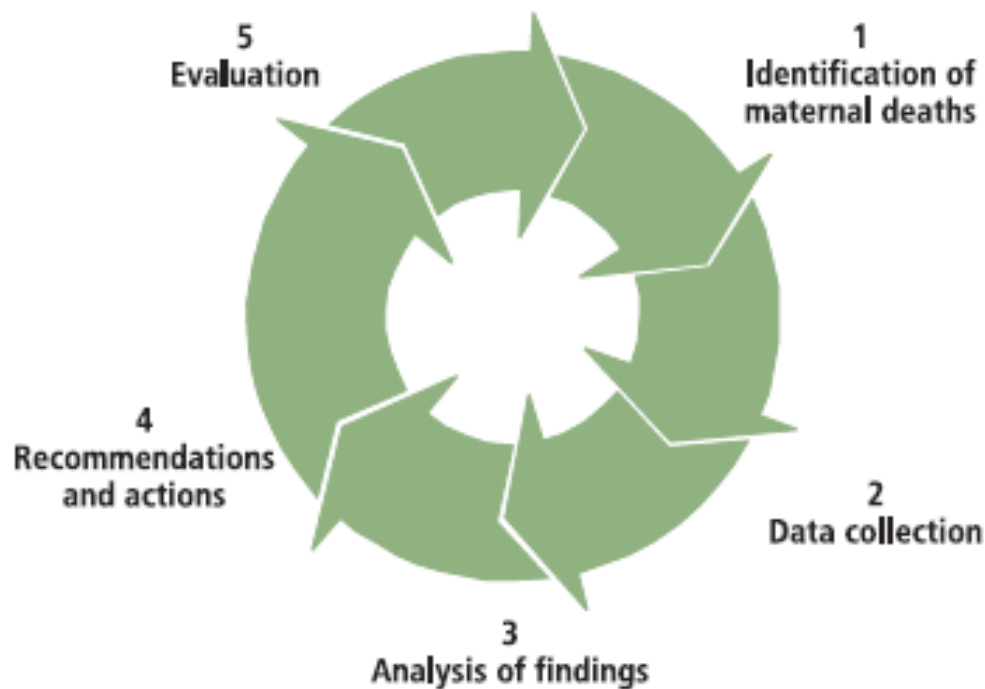

Supplement: MOESM3 [file 9618092]
